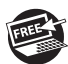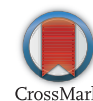

## RESPONSE TO COMMENT ON THE FLAT-SUGAR TRIAL INVESTIGATORS

# Glucose Variability in a 26-Week Randomized Comparison of Mealtime Treatment With Rapid-Acting Insulin Versus GLP-1 Agonist in Participants With Type 2 Diabetes at High Cardiovascular Risk. Diabetes Care 2016;39:973–981

Diabetes Care 2016;39:e188 | DOI: 10.2337/dci16-0021

Kevin D. O'Brien,<sup>1</sup> Irl B. Hirsch,<sup>2</sup>  
Matthew C. Riddle,<sup>3</sup> and  
Jeffrey L. Probstfield,<sup>1</sup> for the  
FLAT-SUGAR Trial Investigators

We thank Monnier et al. (1) for both their interest in our trial (2) and their thoughtful comments. We appreciate their suggestion regarding a possible relationship between exogenous insulin dosage and the observed levels of urinary 8-iso-prostaglandin  $F_{2\alpha}$ , which we plan to address in the future in a more detailed analysis of this and other markers of cardiovascular risk. The upcoming analyses are intended to explore whether changes seen in these measurements are related to the treatment regimens themselves, to changes of glycemic variability attained, or to other on-treatment effects such as change of weight. We also thank Monnier et al. for

pointing out our inadvertent mistake in the assignment of units associated with 8-iso-prostaglandin  $F_{2\alpha}$  values, which should be in pg/mL.

**Duality of Interest.** K.D.O. reports having received grant support from Sanofi. I.B.H. reports receiving honoraria for consulting from Roche, Abbott Diabetes Care, and Becton Dickinson and receiving grants from Sanofi and Intarcia. M.C.R. reports having received grant support from Sanofi, AstraZeneca, Eli Lilly, and Novo Nordisk; honoraria for speaking from Sanofi; and honoraria for consulting from Sanofi, AstraZeneca, Eli Lilly, Elcelyx, Valeritas, and Biodol. J.L.P. reports receiving honoraria for consulting from Sanofi and receiving research grant support from Sanofi,

Bristol-Myers Squibb/AstraZeneca, Eli Lilly, and Bayer. No other potential conflicts of interest relevant to this article were reported.

## References

1. Monnier L, Colette C, Owens DR. Comment on the FLAT-SUGAR Trial Investigators. Glucose variability in a 26-week randomized comparison of mealtime treatment with rapid-acting insulin versus GLP-1 agonist in participants with type 2 diabetes at high cardiovascular risk. Diabetes Care 2016;39:973–981 (Letter). Diabetes Care 2016;39:e186. DOI: 10.2337/dci16-1133
2. The FLAT-SUGAR Trial Investigators. Glucose variability in a 26-week randomized comparison of mealtime treatment with rapid-acting insulin versus GLP-1 agonist in participants with type 2 diabetes at high cardiovascular risk. Diabetes Care 2016;39:973–981

<sup>1</sup>Division of Cardiology, University of Washington, Seattle, WA

<sup>2</sup>Division of Metabolism, Endocrinology & Nutrition, University of Washington, Seattle, WA

<sup>3</sup>Division of Endocrinology, Diabetes & Clinical Nutrition, Oregon Health & Science University, Portland, OR

Corresponding author: Kevin D. O'Brien, cardiac@uw.edu.

© 2016 by the American Diabetes Association. Readers may use this article as long as the work is properly cited, the use is educational and not for profit, and the work is not altered. More information is available at <http://www.diabetesjournals.org/content/license>.
